# Supplementary material for: Metformin-induced suppression of IFN-α via mTORC1 signalling following seasonal vaccination is associated with impaired antibody responses in type 2 diabetes
Source: PubMed Central journal article supplement (PMC7039947; doi:10.1038/s41598-020-60213-0), 2020-02-24
Supplement: 41598_2020_60213_MOESM1_ESM.pdf [file 41598_2020_60213_MOESM1_ESM.pdf]

# Metformin-induced suppression of *IFN-α* via mTORC1 signalling following seasonal vaccination is associated with impaired antibody responses in type 2 diabetes

Wipawee Saenwongsa<sup>1,2</sup>, Arnone Nithichanon<sup>1</sup>, Malinee Chittaganpitch<sup>3</sup>, Kampaew Buayai<sup>3</sup>,

Chidchamai Kewcharoenwong<sup>1</sup>, Boonyarat Thumrongwilainet<sup>4</sup>, Patcharavadee Butta<sup>5</sup>, Tanapat

Palaga<sup>5</sup>, Yoshimasa Takahashi<sup>6</sup>, Manabu Ato<sup>6</sup> and Ganjana Lertmemongkolchai<sup>1\*</sup>

<sup>1</sup>Centre for Research and Development of Medical Diagnostic Laboratories, Faculty of Associated Medical Sciences, Khon Kaen University, Thailand.

<sup>2</sup>Disease Prevention and Control Region 10<sup>th</sup>, Ubonratchathani, Ministry of Public Health, Thailand.

<sup>3</sup>National Influenza Centre, Department of Medical Science, Ministry of Public Health, Thailand.

<sup>4</sup>Yanglum Health Promotion Hospital, Ubonratchathani, Thailand.

<sup>5</sup>Department of Microbiology, Faculty of Science, Chulalongkorn University, Bangkok, Thailand.

<sup>6</sup>National Institute of Infectious Diseases, Tokyo, Japan.

\***Corresponding author:** Ganjana Lertmemongkolchai, PhD. Cellular and Molecular Immunology

Unit, Centre for Research and Development of Medical Diagnostic Laboratories, Faculty of

Associated Medical Sciences, Khon Kaen University, Khon Kaen 40002, Thailand. Tel: +66 4320

3825; fax: +66 4320 3826; email: ganja\_le@kku.ac.th

Diseases, Tokyo, Japan.

Supplementary Figures S1-S6

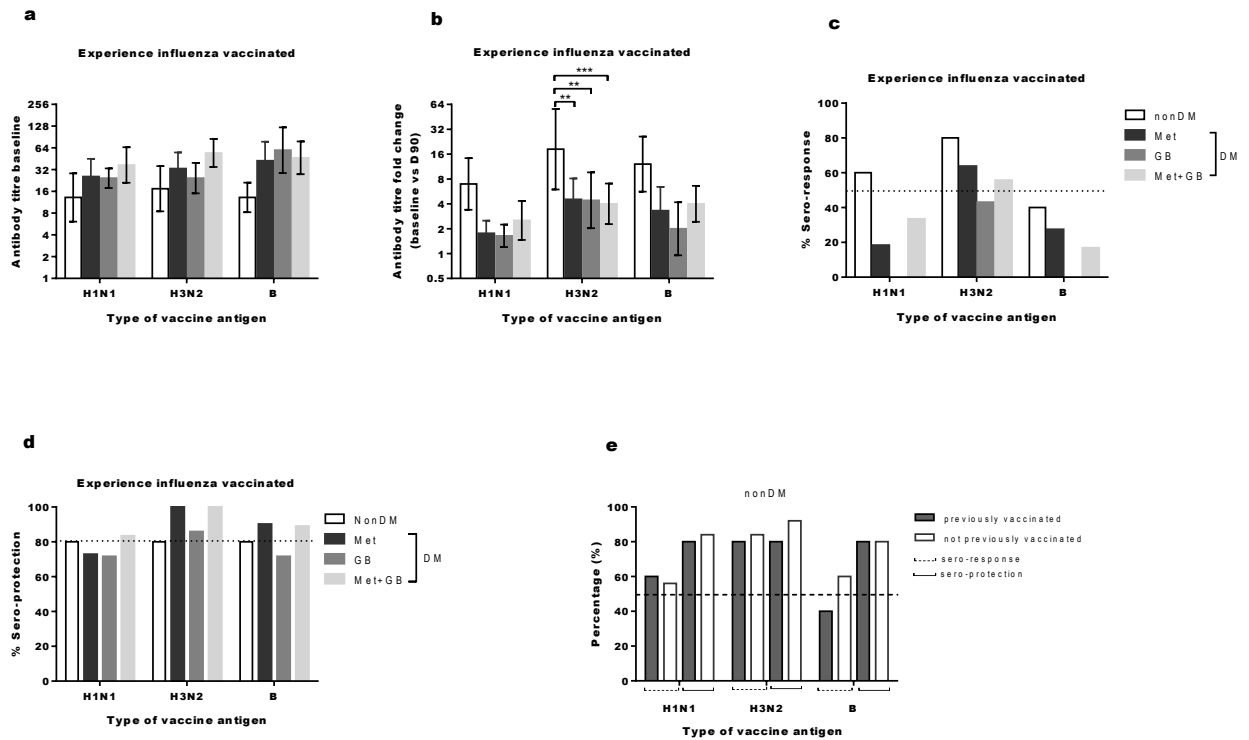

**Supplementary Figure S1: History of influenza vaccination was a confounding factor for a higher baseline (but not significantly so) in DM and seemed not to enhance the HAI response in DM and non-DM.**

(a) The HAI titre at baseline against three types of influenza vaccine antigens in influenza-vaccinated individuals; non-DM (n = 5), Met-DM (n = 11), GB-DM (n = 7), Met+GB-DM (n = 18). (b) HAI titre fold-change (baseline vs. D90) in influenza-vaccinated individuals among the four groups. Horizontal lines represent the geometric mean with 95%CI. Statistical analyses were undertaken using two-way ANOVA,  $**p < 0.01$ ,  $***p < 0.001$ . (c) Sero-protection or (d) sero-response in people who received seasonal vaccination using TIV among the four groups. The dotted line represents 80% or 50% of sero-protection or sero-response, respectively. (e) Percentage (%) of non-DM who reached a sero-response or sero-protection against three type of influenza vaccine antigens compared with individuals who had a history of influenza vaccination (previously vaccinated; n = 5) or who had no history of influenza vaccination (not previously vaccinated; n = 25).

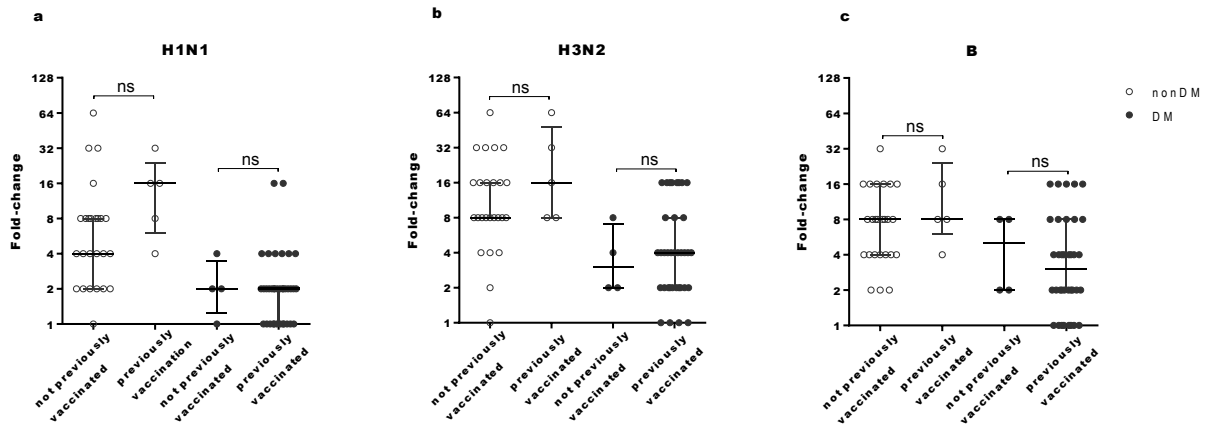

**Supplementary Figure S2: History of influenza vaccination seemed not to enhance HAI titre fold-change in DM and non-DM.**

HAI titre fold-change (baseline vs. D90) in individuals who had a history of influenza vaccination (previously vaccinated, non-DM; n = 5, DM; n = 36) or had no history of influenza vaccination (not previously vaccinated, non-DM; n = 25, DM; n = 4) against **(a)** H1N1, **(b)** H3N2, or **(c)** B antigens. Horizontal lines represent the median with the interquartile range. Each point represents an individual. Statistical analyses were undertaken using Mann-Whitney test. ns; not significant ( $p \geq 0.05$ ), \*\*\*\* $p < 0.0001$ .

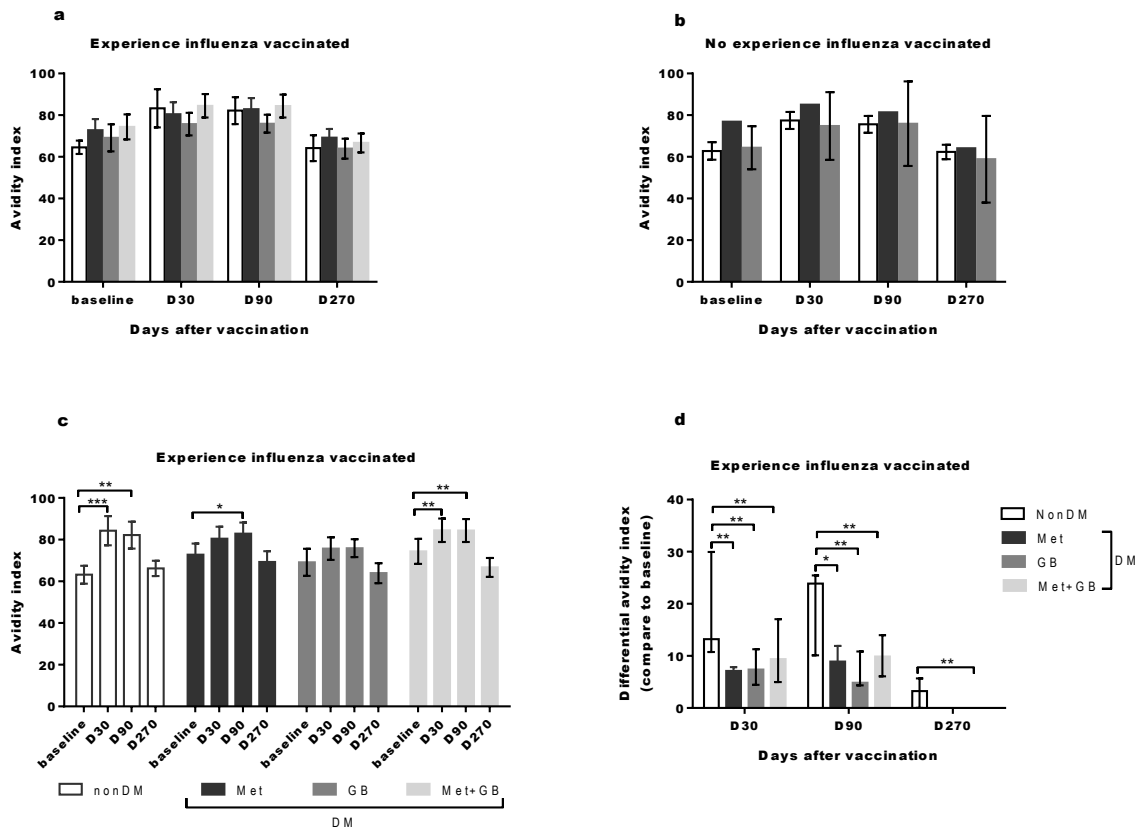

**Supplementary Figure S3: The influenza-specific IgG avidity index at baseline and several time points post-vaccination was not significantly different among non-DM and DM, but Met-DM delayed the response of the IgG avidity index, whereas GB-DM decreased the response of the IgG avidity index.**

Non-DM and DM individuals (a) with (non-DM; n = 5, Met-DM ; n = 11, GB-DM; n = 7, Met+GB-DM; n = 18) or (b) without (non-DM; n = 25, Met-DM; n = 1, GB-DM; n = 3) experience of seasonal influenza vaccination were determined, and the influenza-specific IgG avidity index at baseline and several time points post-vaccination were compared using ELISAs. (c) The IgG avidity index at baseline and several time points post-influenza vaccination in individuals who had experience of influenza vaccination. (d) Differential avidity index of an influenza-specific IgG antibody response compared with baseline as well as D30 or D90 or D270 post-vaccination in those who received seasonal vaccination with TIV. Horizontal lines represent the mean with 95%CI. Statistical analyses were undertaken using two-way ANOVA, \*p<0.05, \*\*p<0.01, \*\*\*p<0.001.

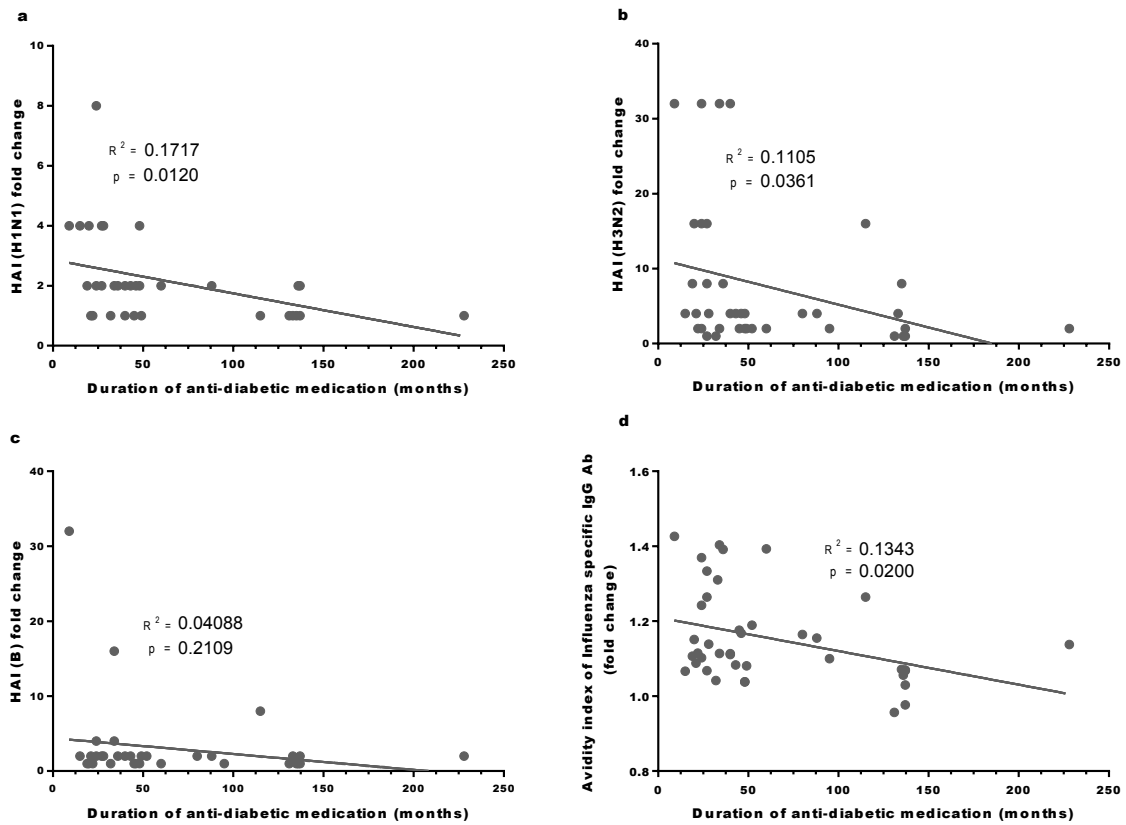

**Supplementary Figure S4: Prolonged treatment reduced HAI antibody fold-changes and the avidity index of influenza-specific IgG antibody against seasonal TIV.**

The correlation between HAI antibody fold-changes in response to (a) H1N1, (b) H3N2), (c) B antigens, or (d) the avidity index of influenza-specific IgG antibody fold-change and duration of anti-diabetic medication (months). The fold change of the response was calculated by dividing the response at D30 by that at baseline (D-7). Each point represents a DM individual (n=40).  $R^2$  and p represent the Pearson correlation coefficient and associated p-value, respectively.

**a** No. 1

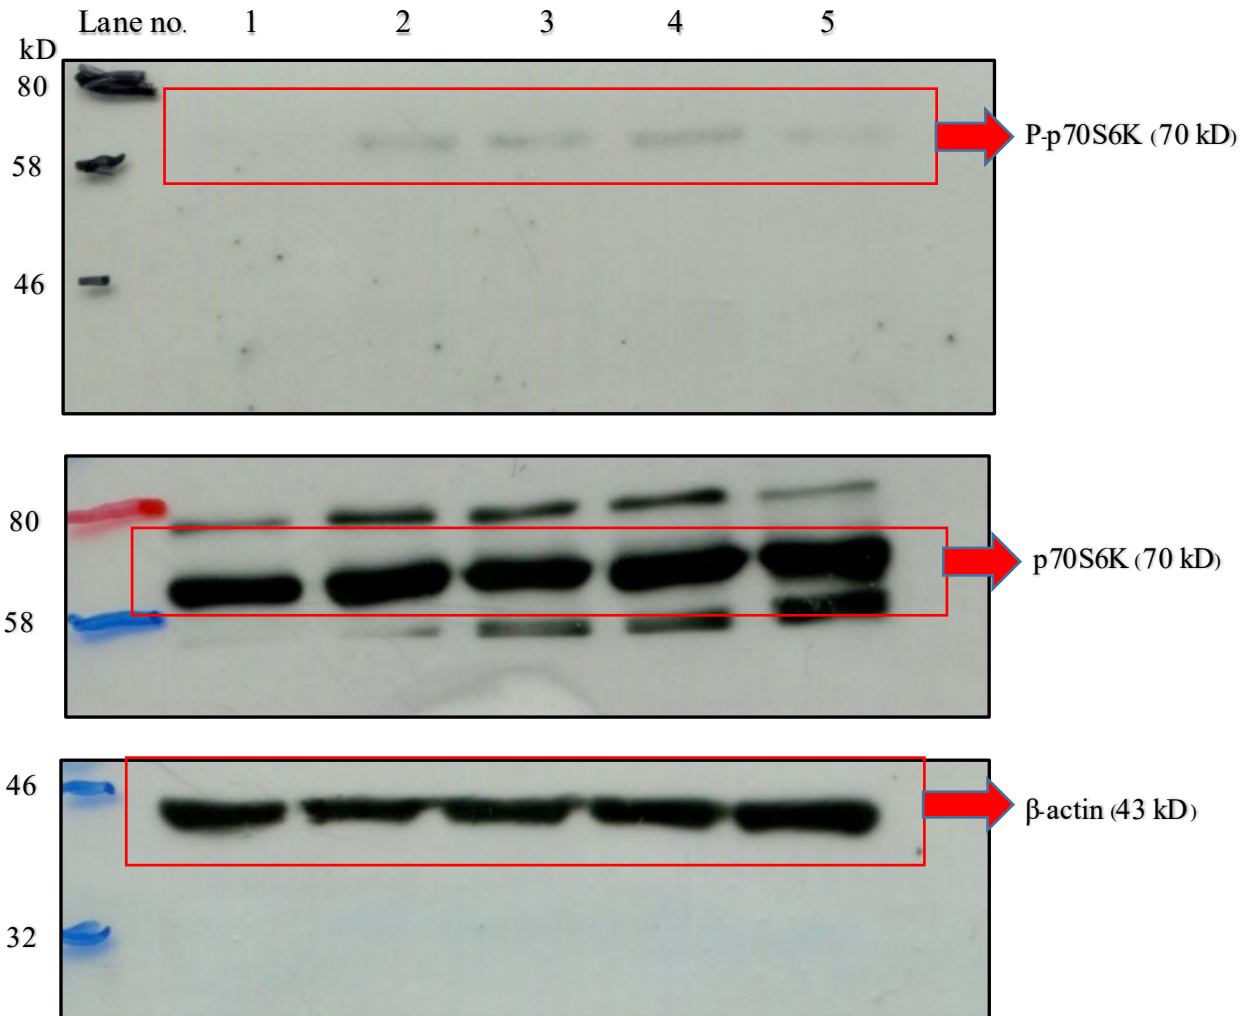

**b**

No. 2

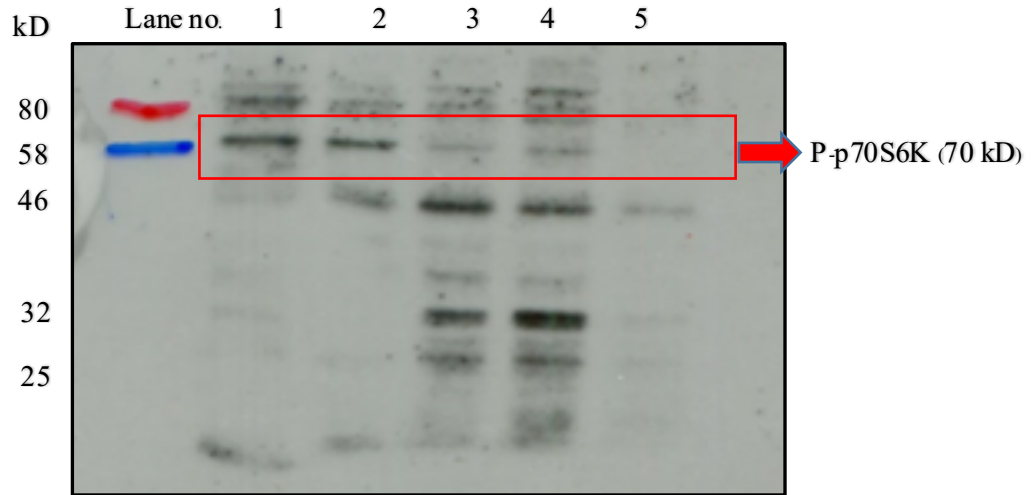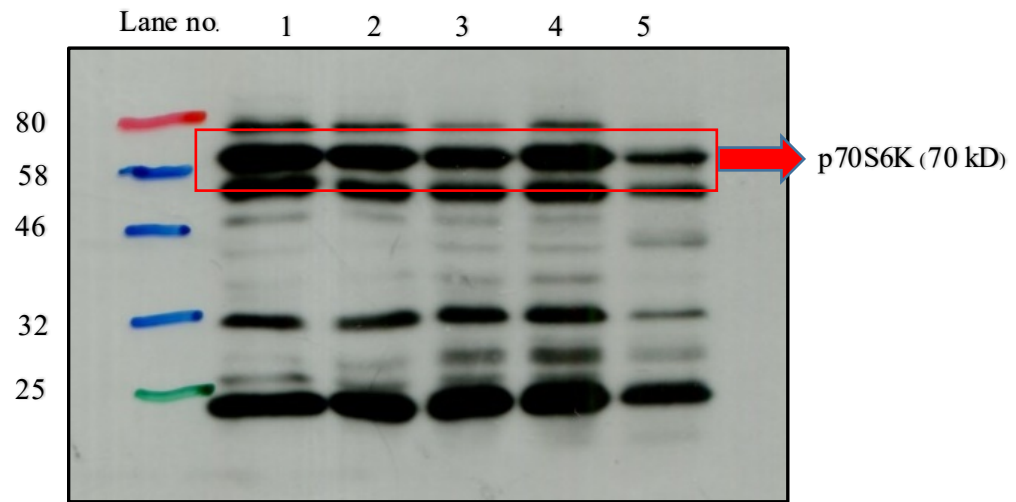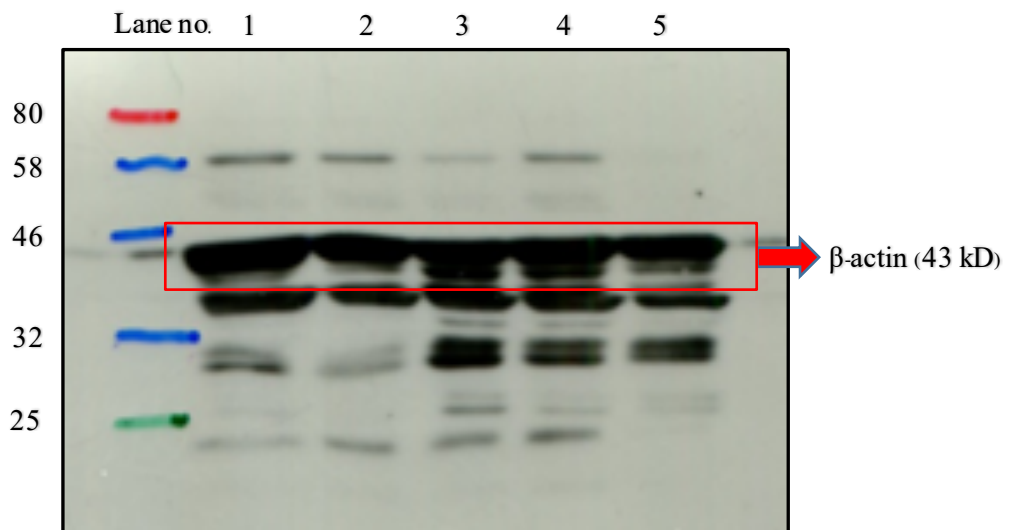

**C** No. 3

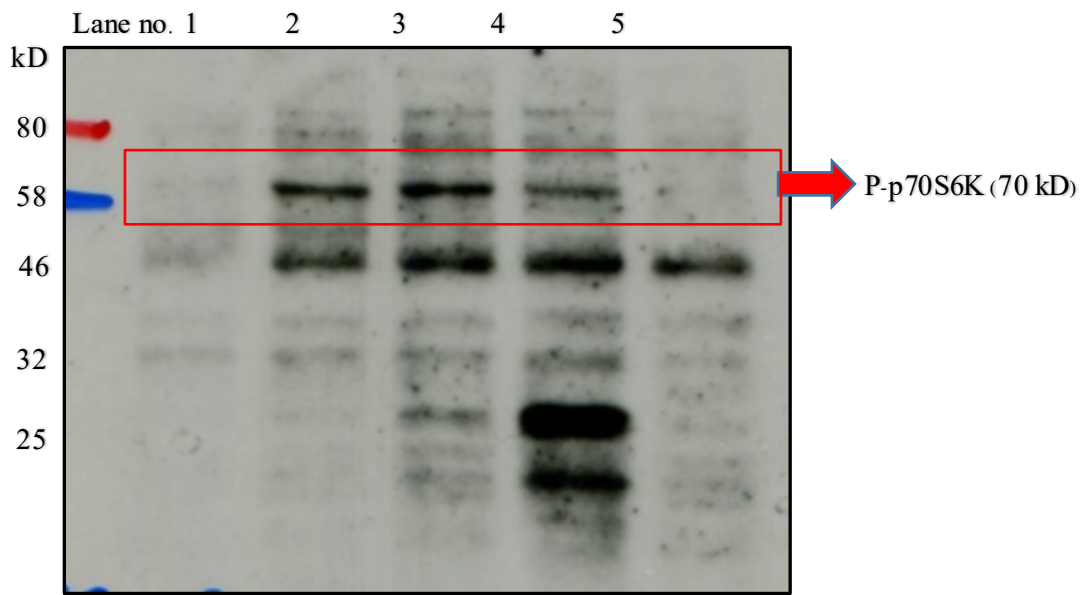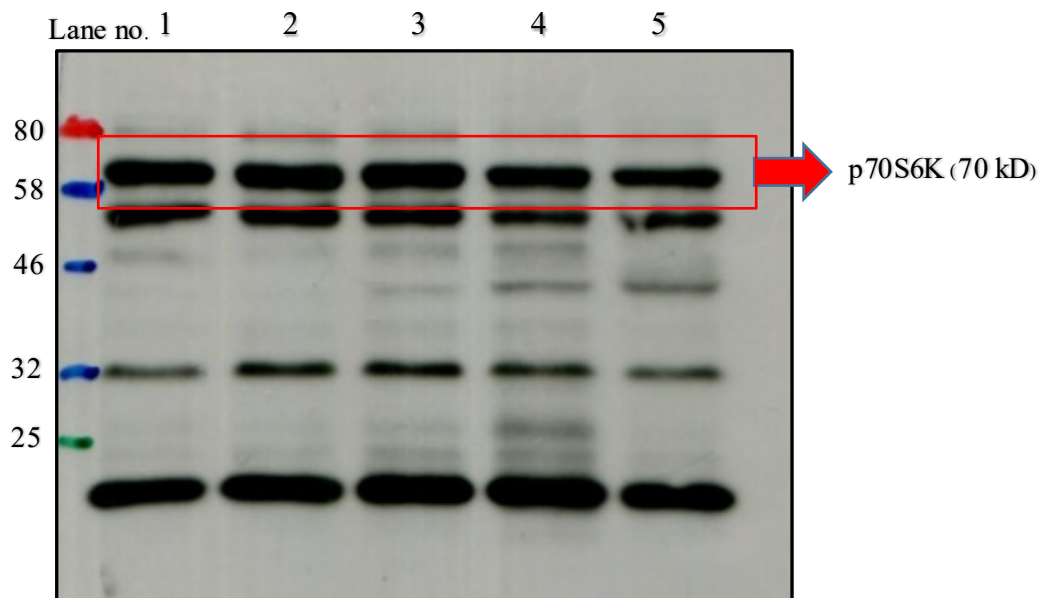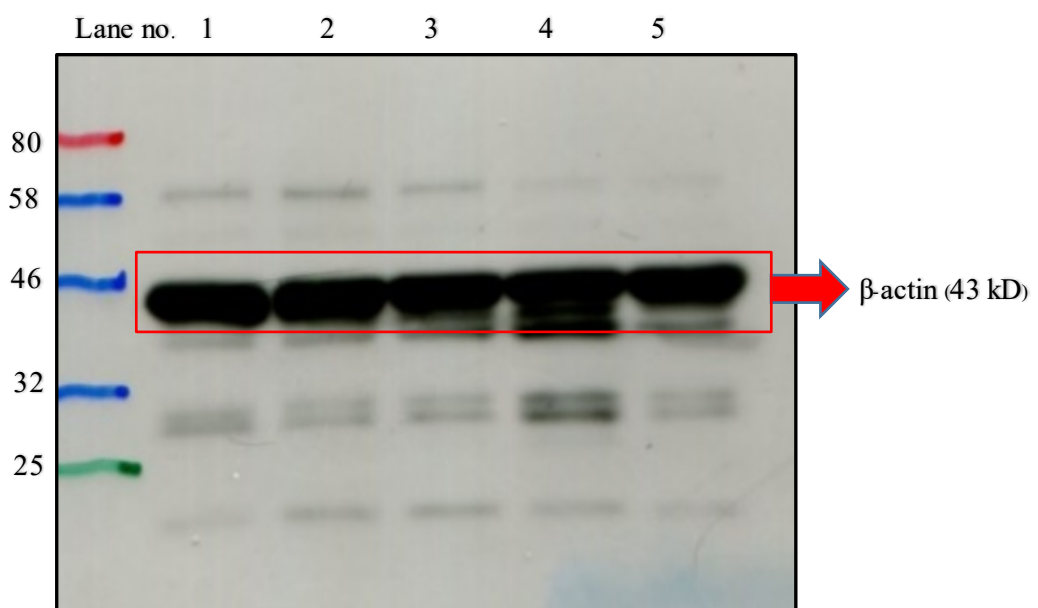



**Supplementary Figure S5: Full-length blots of samples of human PBMCs.**

Samples of PBMCs from three non-DM individuals (a-c) were separated into five conditions: medium control (lane number 1), stimulated with influenza whole-virion (lane number 2), treated with Met (50  $\mu$ M) (lane number 3), Met (100  $\mu$ M) (lane number 4) or rapamycin (50 ng/mL) (lane number 5) before stimulation with influenza whole-virion for 3 h. Protein was extracted from cultured cells, and P-p70S6K and p70S6K determined by western blotting.  $\beta$ -actin was used as a loading control.

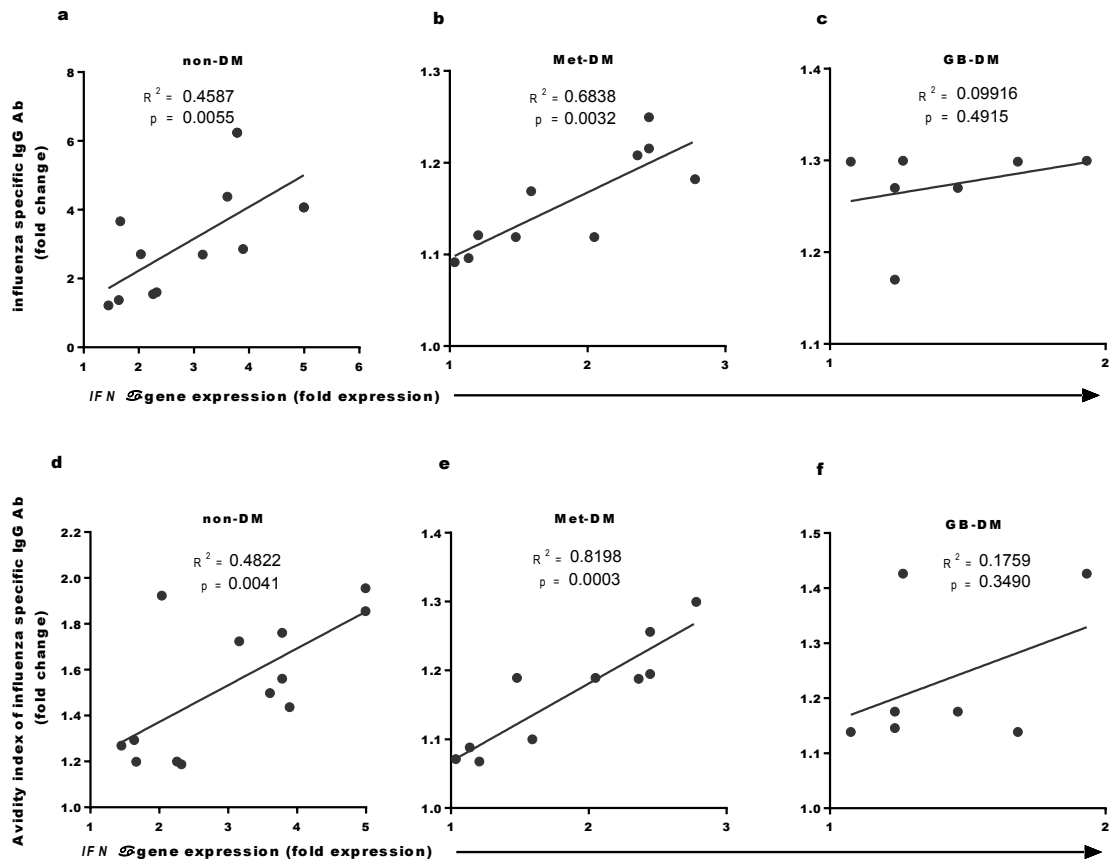

**Supplementary Figure S6: Influenza-specific IgG antibody and the avidity index of the influenza-specific IgG antibody response were positively correlated with *IFN-α* expression in non-DM individuals and DM individuals treated with metformin.**

Using the same subjects as those shown in Figure 2, non-DM (n = 15) or DM individuals who had been treated with metformin (Met-DM, n = 10) or glibenclamide (GB-DM, n = 7) had blood samples collected 90 days post-vaccination. *IFN-α* expression against an influenza vaccine (influenza-split virion, 0.3 µg/ml) *in vitro* was determined by real-time PCR. A correlation was shown between *IFN-α* expression (fold expression) and (a) the influenza-specific IgG antibody response (fold change at D-7/D30) in non-DM or (b) in Met-DM individuals or (c) in GB-DM individuals and (d) in the avidity index of influenza-specific IgG antibody (fold change at D-7/D30) in non-DM or (e) in Met-DM individuals or (f) in GB-DM individuals. Each point represents an individual. R<sup>2</sup> and p represent the Pearson correlation coefficient and associated p-value, respectively.

## Supplementary Table S1

**Supplementary Table S1: Multivariate analysis of the host factors that affect the immune response to seasonal trivalent influenza vaccine**

| Category                                    | N  | OR     | 95%CI        | P     |
|---------------------------------------------|----|--------|--------------|-------|
| HAI (H1N1) fold rise $\geq 4$ (D-7/D30)     |    |        |              |       |
| DM                                          | 40 |        |              |       |
| Non-DM                                      | 30 | 4.631  | 0.261-82.260 | 0.296 |
| Age $\geq 60$ years                         | 17 |        |              |       |
| Age $< 60$ years                            | 53 | 3.201  | 0.598-17.113 | 0.174 |
| Female                                      | 50 |        |              |       |
| Male                                        | 20 | 0.517  | 0.068-3.910  | 0.523 |
| BMI $\geq 30$ kg/m <sup>2</sup>             | 7  |        |              |       |
| BMI $< 30$ kg/m <sup>2</sup>                | 63 | 0.215  | 0.022-2.049  | 0.182 |
| HbA <sub>1c</sub> $< 6.5\%$                 | 9  |        |              |       |
| HbA <sub>1c</sub> 6.5-8.4%                  | 15 | 3.057  | 0.349-26.743 | 0.313 |
| HbA <sub>1c</sub> $\geq 8.5\%$              | 16 | 0.858  | 0.086-8.523  | 0.897 |
| Duration of drug use $\geq 40$ months       | 22 |        |              |       |
| duration of drug use $< 40$ months          | 18 | 11.127 | 1.461-84.732 | 0.020 |
| Not previously vaccinated against influenza | 30 |        |              |       |
| Previously vaccinated against influenza     | 40 | 1.492  | 0.209-10.652 | 0.690 |

N = number of individuals, OR = odds ratio, CI = confidence interval, Likelihood ratio, logistic regression was used for analyses

## Supplementary Table S2

**Supplementary Table S2: Demographic characteristics of individuals participating in the study**

| Demographic                    |                | non-DM                  | new-DM                   | Met-DM                    | GB-DM                     | Met+GB-DM                 | P                                                                                                |
|--------------------------------|----------------|-------------------------|--------------------------|---------------------------|---------------------------|---------------------------|--------------------------------------------------------------------------------------------------|
| Age (years)                    | Median (range) | 53 (49-58)              | 52 (39-67)               | 52 (38-64)                | 56 (44-69)                | 55 (42-67)                | a-j <sup>ns</sup>                                                                                |
| Sex (%)                        | Female         | 77                      | 68                       | 62                        | 70                        | 65                        | ND                                                                                               |
| BMI (kgm <sup>2</sup> )        | Median (range) | 23.4 (19.5-33.5)        | 26.4 (23.4-33.2)         | 24.6 (19.9-33.8)          | 24.9 (19.4-29.1)          | 25.6 (18.3-30.7)          | a-j <sup>ns</sup>                                                                                |
| FBS (mg%) baseline             | Median (range) | 90.5 (55-137)<br>n = 30 | ND                       | 121 (95-285)<br>n = 12    | 126 (89-376)<br>n = 10    | 134.5 (98-435)<br>n = 18  | a-d <sup>**</sup> , h-j <sup>ns</sup>                                                            |
| FBS (mg%) day90                | Median (range) | 83.5 (68-105)<br>n = 15 | 279 (180-325)<br>n = 14  | 137.5 (96-217)<br>n = 14  | 118.5 (95-335)<br>n = 9   | 123.5 (84-427)<br>n = 18  | a <sup>****</sup> , b <sup>***</sup> , c <sup>***</sup> , d <sup>**</sup> , e-j <sup>ns</sup>    |
| HbA <sub>1c</sub> (%) baseline | Median (range) | ND                      | ND                       | 7.5 (5.3-11.7),<br>n = 12 | 8.2 (6.4-11.6),<br>n = 10 | 7.9 (5.1-11.9),<br>n = 18 | h-j <sup>ns</sup>                                                                                |
| HbA <sub>1c</sub> (%) day 90   | Median (range) | 5.5 (4.7-5.9)<br>n = 15 | 8.2 (7.5-10.2)<br>n = 14 | 7.3 (5.8-10.6)<br>n = 14  | 7.4 (6.2-9.8)<br>n = 9    | 7.9 (5.7-11.4)<br>n = 18  | a <sup>****</sup> , b <sup>****</sup> , c <sup>***</sup> , d <sup>****</sup> , e-j <sup>ns</sup> |

DM: diabetes mellitus; ND: not determined; FBS: fasting blood sugar.

Statistical analyses were done using one-way ANOVA. ns: non-significant;

<sup>a</sup> non-DM vs. new-DM

<sup>b</sup> non-DM vs. Met-DM

<sup>c</sup> non-DM vs. GB-DM

<sup>d</sup> non-DM vs. Met+GB-DM

<sup>e</sup> new-DM vs. Met-DM

<sup>f</sup> new-DM vs. GB-DM

<sup>g</sup> new-DM vs. Met+GB-DM

<sup>h</sup> Met-DM vs. GB-DM

<sup>i</sup> Met-DM vs. Met+GB-DM

<sup>j</sup> GB-DM vs. Met+GB-DM

\*p<0.05, \*\*p<0.01, \*\*\*p<0.001, \*\*\*\*p<0.0001
